# Supplementary material for: In Silico Identification of Potential Druggable Binding Sites on CIN85 SH3 Domain
Source: MDPI journal article supplement (doi:10.3390/ijms22020534), 2021-01-07
Supplement: s1 [file s1]

# ***In silico* identification of potential druggable binding sites on CIN85 SH3 domain**

Serena Vittorio <sup>1,\*</sup>, Thomas Seidel <sup>2</sup>, Arthur Garon <sup>2</sup>, Rosaria Gitto <sup>1</sup>, Thierry Langer <sup>2</sup>, Laura De Luca <sup>1,\*</sup>

<sup>1</sup> Department of Chemical, Biological, Pharmaceutical and Environmental Sciences, University of Messina, Viale Palatucci 13, I-98168, Messina, Italy; [svittorio@unime.it](mailto:svittorio@unime.it) (S.V.); [rgitto@unime.it](mailto:rgitto@unime.it) (R.G.); [ldeluca@unime.it](mailto:ldeluca@unime.it) (L.D.L.)

<sup>2</sup> Department of Pharmaceutical Chemistry, University of Vienna, Althanstrasse 14, A-1090 Vienna, Austria; [thomas.seidel@univie.ac.at](mailto:thomas.seidel@univie.ac.at) (T.S.); [arthur.garon@univie.ac.at](mailto:arthur.garon@univie.ac.at) (A.G.); [thierry.langer@univie.ac.at](mailto:thierry.langer@univie.ac.at) (T.L.)

\*Correspondence: [svittorio@unime.it](mailto:svittorio@unime.it); Tel.: +39-090-676-6465 (S.V.); [ldeluca@unime.it](mailto:ldeluca@unime.it); Tel.: +39-090-676-6410 (L.D.L.)

## **Table of content:**

|                                                                                                                                                                                           |    |
|-------------------------------------------------------------------------------------------------------------------------------------------------------------------------------------------|----|
| <b>TableS1</b> List of the residues forming the identified binding sites in CIN85 SH3A and corresponding amino acids in the other CIN85 SH3 domains obtained from 3D superimposition..... | S2 |
| <b>FigureS1</b> Superimpositions between some of the NMR derived models contained in 2K9G and some of the MD derived conformers.....                                                      | S3 |

**Table S1** List of the residues forming the identified binding sites in CIN85 SH3A and corresponding amino acids in the other CIN85 SH3 domains obtained from 3D alignment.

| Binding site | CIN85 SH3A                                                           | CIN85 SH3B                                                                     | CIN85 SH3C                                                                     |
|--------------|----------------------------------------------------------------------|--------------------------------------------------------------------------------|--------------------------------------------------------------------------------|
| <b>P1</b>    | Tyr10, Glu17, Leu18, Ile20, Trp36, Leu47, Phe48, Pro49, Phe52        | Tyr109, Glu116, Leu117, Leu119, Trp135, Met146, Phe147, Pro148, Phe151         | Tyr278, Glu285, Leu286, Ile288, Trp306, Val317, Phe318, Pro319, Phe322         |
| <b>P2</b>    | Val2, Glu3, Ala4, Ile29, Trp37, Asp50, Val53, Arg54, Glu55           | Arg101, Arg102, Cys103, Val127, Trp136, Ser149, Ile52, Lys153, Glu154          | Asp270, Tyr271, Cys272, Leu296, Trp307, Asp320, Val323, Lys324, Leu325         |
| <b>CS1</b>   | Tyr10, Asp16, Glu17, Leu18, Ile20, Trp36, Leu47, Phe48, Pro49, Phe52 | Tyr109, Asp115, Glu116, Leu117, Leu119, Trp135, Met146, Phe147, Pro148, Phe151 | Tyr278, Asp284, Glu285, Leu286, Ile288, Trp306, Val317, Phe318, Pro319, Phe322 |
| <b>CS2</b>   | Glu3, Ala4, Ile25, Ile26, Thr27, Gln40, Ile41, Asn42, Lys57          | Arg102, Cys103, Ile124, Ile125, Glu126, Val139, Leu140, Asn141, Ser156         | Tyr271, Cys272, Ile293, Val294, Thr295, Glu310, Leu311, Asn312, Pro327         |
| <b>CS3</b>   | Asp16, Glu17, Leu18, Glu38, Gly39, Arg44, Arg45, Gly46, Leu47        | Asp115, Glu116, Leu117, Glu137, Gly138, Lys143, Thr144, Gly145, Met146         | Asp284, Glu285, Leu286, Glu308, Gly309, Arg314, Arg315, Gly316, Val317         |
| <b>CS4</b>   | Leu18, Thr19, Ile20, Ser21, Glu24, Ile41, Asn42, Arg44               | Leu117, Glu118, Leu119, Lys120, Asp123, Leu140, Asn141, Lys143                 | Leu286, Thr287, Ile288, Lys289, Asp292, Leu311, Asn312, Arg314                 |
| <b>CS5</b>   | Glu7, Phe8, Trp37, Asp50, Asn51, Phe52, Val53, Arg54, Glu55          | Ala106, Phe107, Trp136, Ser149, Asn150, Phe151, Ile152, Lys153, Glu154         | Ile275, Phe276, Trp307, Asp320, Asn321, Phe322, Val323, Lys324, Leu325         |
| <b>CS6</b>   | Gly34, Gly35, Trp36, Pro49, Asp50, Asn51                             | Glu133, Gly134, Trp135, Pro148, Ser149, Asn150                                 | Val304, Gly305, Trp306, Pro319, Asp320, Asn321                                 |
| <b>CS7</b>   | Asp15, Glu17, Leu18, Thr19, Arg44, Arg45                             | Asp114, Glu116, Leu117, Glu118, Lys143, Thr144                                 | Asp283, Glu285, Leu286, Thr287, Arg314, Arg315                                 |

**FigureS1** Superimpositions between some of the NMR derived models contained in 2K9G and some of the MD derived conformers.

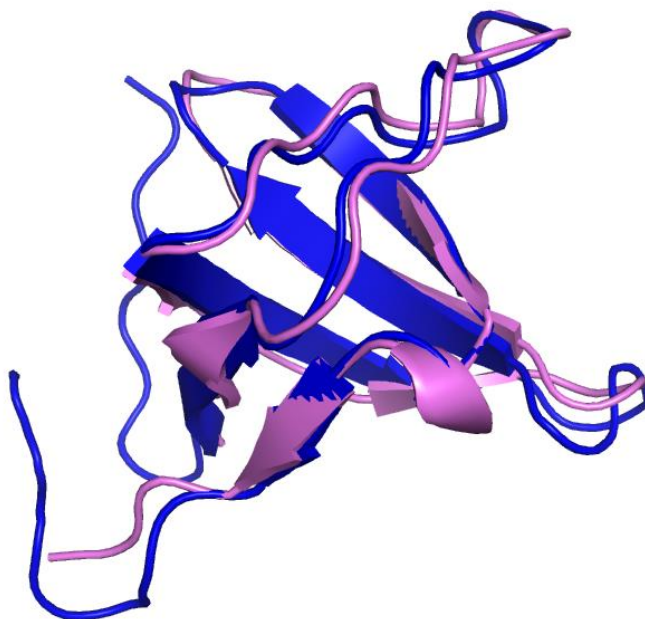

A) Model 1 of 2K9G (blue) superimposed to the representative frame of C2 (violet) (RMSD= 1.090 Å)

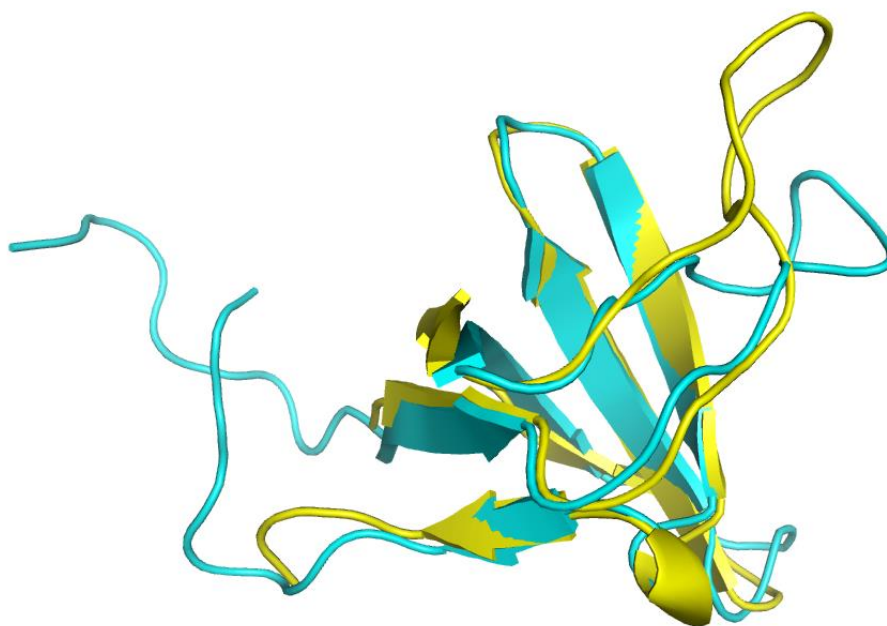

B) Model 2 of 2K9G (cyan) overlapped to the representative frame of C27 (yellow) (RMSD= 1.507 Å)

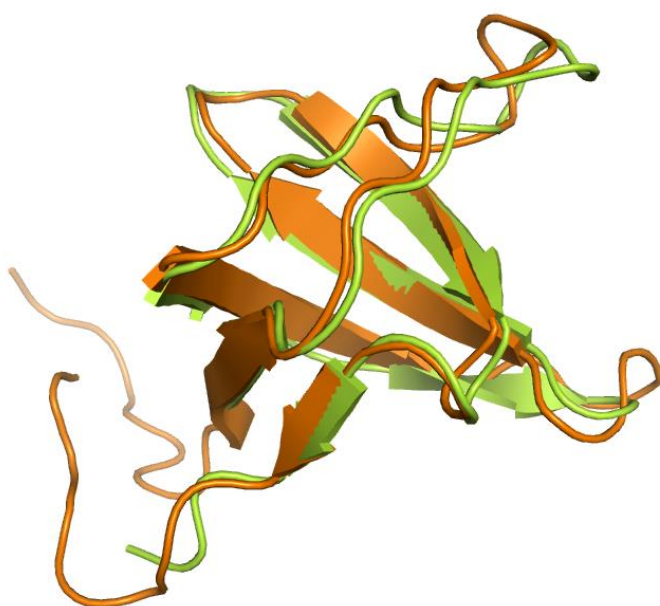

C) Model 3 of 2K9G (green) superimposed to the representative frame of C1 (green) (RMSD= 1.163 Å)

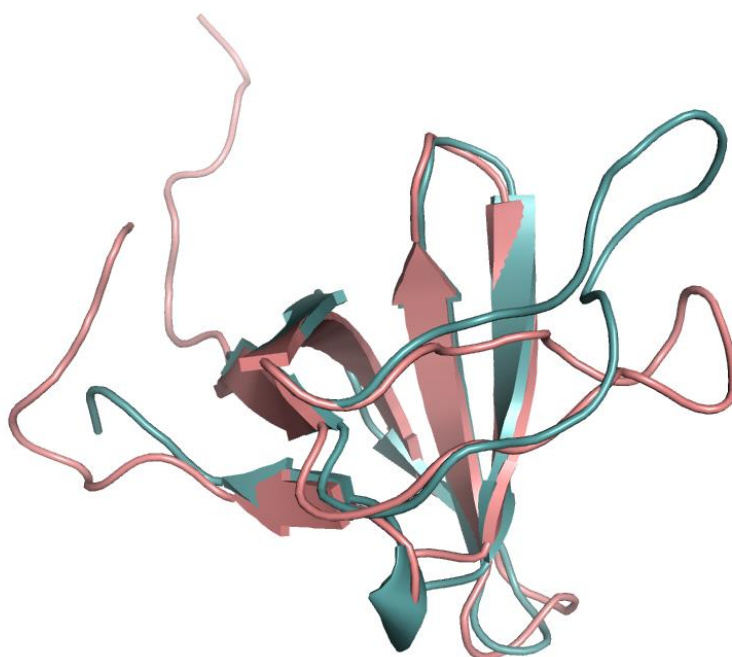

D) Model 5 of 2K9G (pink) superimposed to the representative frame of C26 (palecyan). (RMSD= 1.612Å)

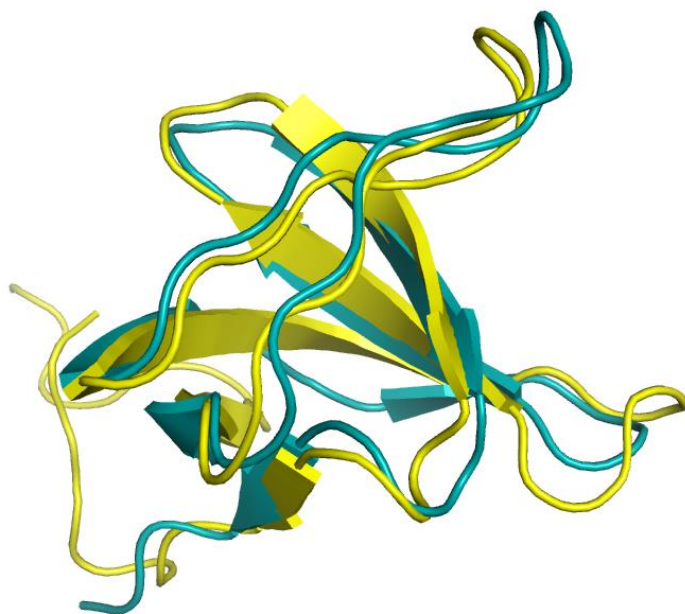

E) Model10 of 2K9G (giallo) superimposed to the representative frame of C10 (deepteal) (RMSD= 1.931 Å).

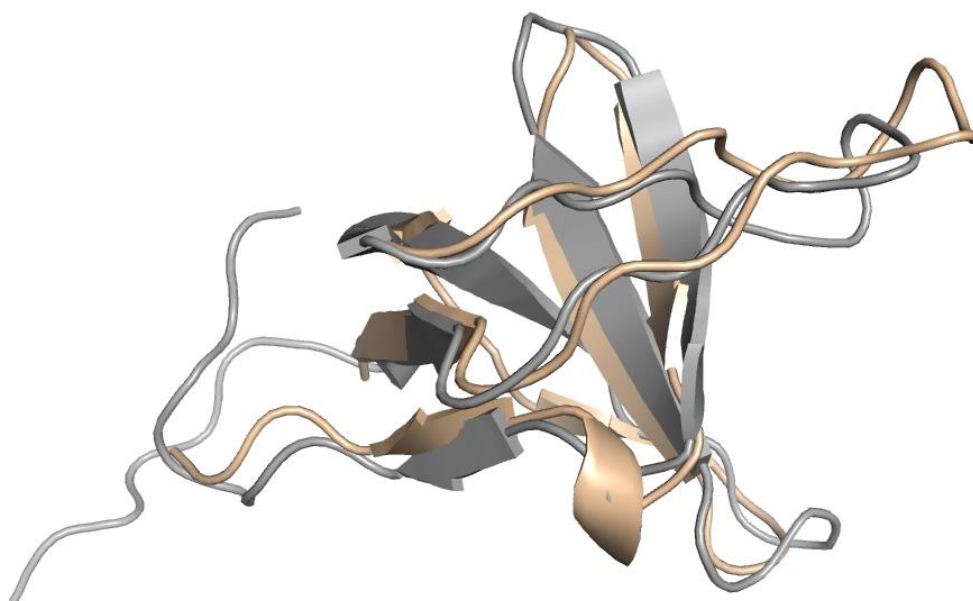

F) Model14 of 2K9G (grey) superimposed to the representative frame of C12 (wheat). (RMSD= 2.498Å)

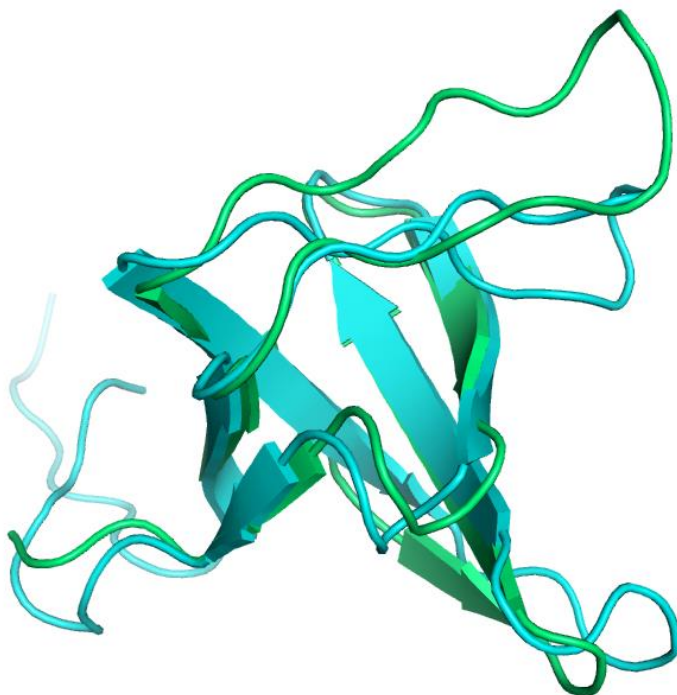

G) Model16 of 2K9G (cyan) superimposed to the representative frame of C17 (green) (RMSD = 1.777 Å)

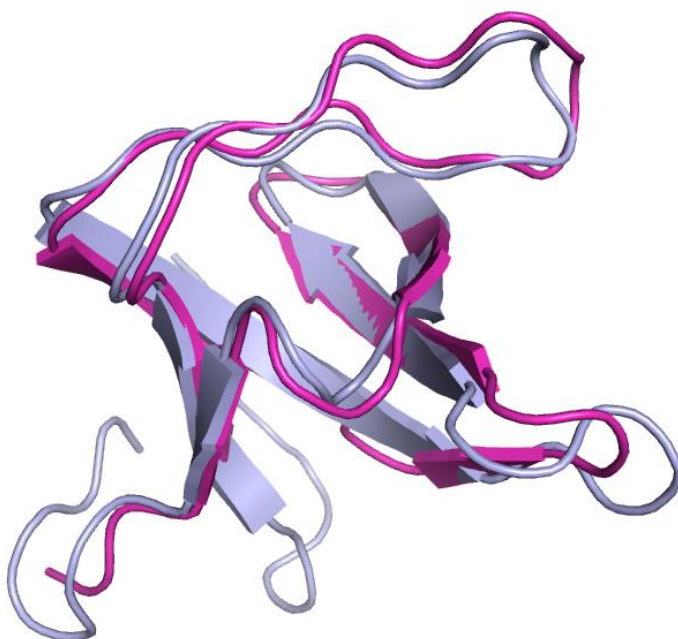

H) Model20 of 2K9G (lightblue) superimposed to the representative frame of C6 (magenta) (RMSD = 0.914).
